# Supplementary material
Source: PubMed Central journal article supplement (PMC7960279)
Supplement: 15-01280.pdf [file 15-01280.pdf]

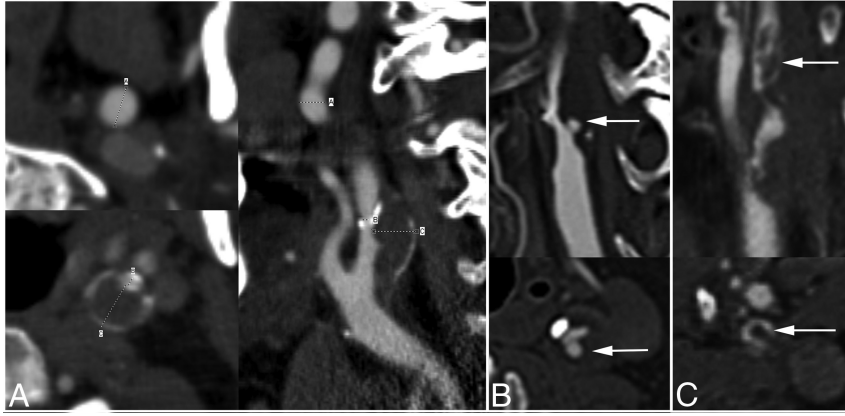

**ON-LINE FIG 1.** A, Stenosis was measured by using percentage diameter stenosis  $[(A - B) / A]$  and millimeter stenosis (B), where 'A' and 'B' are measured at the level of maximal stenosis and the cervical ICA superior to the carotid bulb, respectively. Maximum plaque thickness was measured in the transverse plane on CTA images ('C'). B, The presence of ulceration (*arrow*) was determined on CTA or MRA of the neck by using a 2-mm measurement threshold. C, Intraluminal thrombus (*arrow*) was defined as a filling defect surrounded by contrast on CTA.
